# Supplementary material
Source: PubMed Central journal article supplement (PMC4062613)
Supplement: NIHMS551312-supplement-10802_2013_9834_MOESM1_ESM.pdf [file NIHMS551312-supplement-10802_2013_9834_MOESM1_ESM.pdf]

Supplementary Table 1

*Odds ratios of individual DSM-IV/V symptoms in predicting ADHD diagnosis at different times*

| <u>DSM-IV Symptom</u>                      | <u>A: T1</u> |                 |             | <u>B: T2</u> |                 |             | <u>C: T3</u> |                 |             |
|--------------------------------------------|--------------|-----------------|-------------|--------------|-----------------|-------------|--------------|-----------------|-------------|
|                                            | <u>O.R.</u>  | <u>95% C.I.</u> | <u>R.O.</u> | <u>O.R.</u>  | <u>95% C.I.</u> | <u>R.O.</u> | <u>O.R.</u>  | <u>95% C.I.</u> | <u>R.O.</u> |
| 1. Fails to give close attention, careless | 7.3          | 3.1-16.9        | 17          | 15.8         | 6.7-37.0        | 11          | 31.5         | 12.1-82.2       | 5           |
| 2. Difficulty sustaining attention         | 13.7         | 5.8-32.0        | 12          | 17.8         | 7.4-42.9        | 9           | 40.6         | 14.7-111.7      | 4           |
| 3. Does not listen                         | 23.8         | 9.3-61.2        | 5           | 17.5         | 7.2-42.5        | 10          | 21.3         | 8.8-51.7        | 10          |
| 4. Does not follow through                 | 12.7         | 5.3-30.4        | 13          | 24.7         | 9.6-63.4        | 5           | 40.9         | 15.3-109.133    | 3           |
| 5. Difficulty organizing                   | 10.7         | 4.4-25.8        | 15          | 11.9         | 5.2-27.2        | 15          | 20.7         | 8.7-49.5        | 11          |
| 6. Avoids tasks                            | 3.4          | 1.5-8.0         | 18          | 10.9         | 4.7-25.2        | 16          | 9.1          | 4.0-20.4        | 16          |
| 7. Loses things                            | 11.4         | 4.5-28.9        | 14          | 13.2         | 5.6-30.9        | 14          | 27.7         | 9.7-79.2        | 7           |
| 8. Easily distracted                       | 19.9         | 7.8-50.9        | 6           | 78.0         | 17.5-347.1      | 1           | 30.6         | 10.8-86.4       | 6           |
| 9. Forgetful                               | 26.4         | 7.2-96.2        | 3           | 13.9         | 5.7-33.8        | 13          | 43.8         | 12.3-155.9      | 2           |
| 10. Fidgets or squirms                     | 77.0         | 17.2-344.5      | 1           | 31.0         | 10.9-88.1       | 2           | 53.9         | 18.3-159.0      | 1           |
| 11. Leaves seat                            | 27.7         | 9.7-78.6        | 2           | 16.7         | 7.0-39.6        | 11          | 16.1         | 6.9-37.6        | 14          |
| 12. Runs or climbs                         | 24.4         | 9.6-61.7        | 4           | 21.1         | 8.7-51.6        | 8           | 19.3         | 7.5-49.5        | 12          |
| 13. Difficulty playing quietly             | 17.2         | 5.8-50.4        | 10          | 23.7         | 7.5-74.6        | 4           | 24.3         | 6.8-86.0        | 8           |
| 14. "On the go"                            | 18.2         | 7.5-44.2        | 7           | 21.7         | 8.7-54.2        | 7           | 22.1         | 7.8-63.0        | 9           |
| 15. Talks excessively                      | 9.3          | 4.1-21.0        | 16          | 3.4          | 1.7-7.1         | 18          | 7.5          | 3.5-16.1        | 18          |
| 16. Blurts out answers                     | 17.6         | 7.3-42.7        | 8           | 10.0         | 4.5-22.2        | 17          | 10.4         | 4.5-24.2        | 15          |
| 17. Difficulty awaiting turn               | 17.6         | 7.3-42.7        | 9           | 15.8         | 6.6-37.5        | 12          | 16.6         | 6.5-42.4        | 13          |
| 18. Interrupts or intrudes                 | 15.8         | 6.0-41.6        | 11          | 23.4         | 8.3-65.4        | 6           | 8.2          | 3.8-17.6        | 17          |

*Note.* T1=Time 1; T2=Time 2; T3=Time 3; O.R.=Odds Ratio; 95% C.I.=95% Confidence Interval; R.O.=Rank Order.
